# Supplementary material
Source: Springer Nature journal article supplement (https://www.springermedizin.de/resource/supplementary/12955_2007_377_MOESM1_ESM.pdf/9560268)
Supplement: MOESM1 [file 9560268]

### **Original card descriptions**

DRUGS – drug use – e.g., alcohol, heroin, cocaine, crack

EDUCATION – e.g., formal schooling, literacy programs

FAMILY – e.g., parents, children, siblings, foster families (not friends)

SEX – e.g., sexual intimacy, quantity or quality of sex, sex in exchange for money or drugs, sexual abuse

### **Revised card descriptions**

DRUGS & ALCOHOL – e.g., marijuana, speed, alcohol, heroin, cocaine, crack, etc. and includes selling, buying, and using

EDUCATION & TRAINING – e.g., formal schooling, literacy programs, high school equivalency, life skills training, job training, certification, pre-employment programs, language courses (e.g., ESL)

FAMILY – e.g., parents, children, siblings, foster families, grandparents, cousins, aunts and uncles (not friends)

SEX – e.g., sexual intimacy, sex in exchange for money or drugs, being safe when having sex (use of condoms), birth control, sexual abuse
